# Supplementary material for: Light- and temperature-assisted spin state annealing: accessing the hidden multistability
Source: Royal Society of Chemistry journal article supplement (doi:10.1039/c9sc05971g), 2020-01-01
Supplement: c9sc05971g1.pdf [file c9sc05971g1.pdf]

## Supporting Information for

# Light- and Temperature-Assisted Spin State Annealing: Accessing the Hidden Multistability

Yan-Cong Chen, Yan Meng, Yan-Jie Dong, Xiao-Wei Song, Guo-Zhang Huang, Chuan-Lei Zhang, Zhao-Ping Ni, Jakub Navařík, Ondřej Malina, Radek Zbořil and Ming-Liang Tong

## CONTENTS

**Figure S1:**  $\chi_M T-T$  for **1** with different sweeping rate.

**Figure S2:** LIESST for **1** at 5 K.

**Figure S3**  $\chi_M T-T$  for **1** after LIESST at 5 K.

**Figure S4:** High temperature LASSA for **1** at 85~100 K.

**Figure S5:** LASSA again for **1** at 70~80 K.

**Figure S6:** LASSA again for **1** at 85 K.

**Figure S7:** LIESST for **1** at 5 K with various sources of laser.

**Figure S8:**  $\chi_M T-T$  for **1** after LIESST with a 355 nm, 473 nm or 671 nm laser.

**Figure S9:**  $\chi_M T-T$  for **1** after LIESST with a 1064 nm, 830 nm or 905 nm laser, and after bidirectional LIESST with firstly a 532 nm laser and secondly an 830 nm or 905 nm laser.

**Figure S10:**  $\chi_M T-T$  for **1** after LIESST with an 830 nm laser, warmed to 105 K and then cooled.

**Figure S11:** Annealing of  $\chi_M T$  for **1** after LIESST with various lasers.

**Figure S12:** Annealing of  $\chi_M T$  for **1** after cooling to 80 K at various cooling rates.

**Figure S13:**  $\chi_M T-T$  for **1** after TASSA at 75 K and 80 K.

**Table S1:** Crystal Data and Structural Refinements for **1**.

**Table S2:** Selected bond lengths and bond angles for **1**.

**Figure S14:** Coordination environment and spin state of Fe(II) in **1** in the HS/MS/LS state.

**Figure S15:** Packing diagram for **1** in the HS/MS/LS state.

**Figure S16:** PXRD for **1** at 80 K in the MS/MS\* state.

**Table S3:** Selected structural parameters in different states for **1**.

**Figure S17:** Fingerprint plot of **1** in the HS state.

**Figure S18:** Fingerprint plot of **1** in the LS state.

**Figure S19:** Fingerprint plot of HS Fe1 in **1** in the ordered MS state.

**Figure S20:** Fingerprint plot of LS Fe2 in **1** in the ordered MS state.

**Figure S21:** Fingerprint plot of **1** in the disordered MS\* state.

**Figure S22** Overlapped crystal structure for **1** in the HS/MS/LS states.

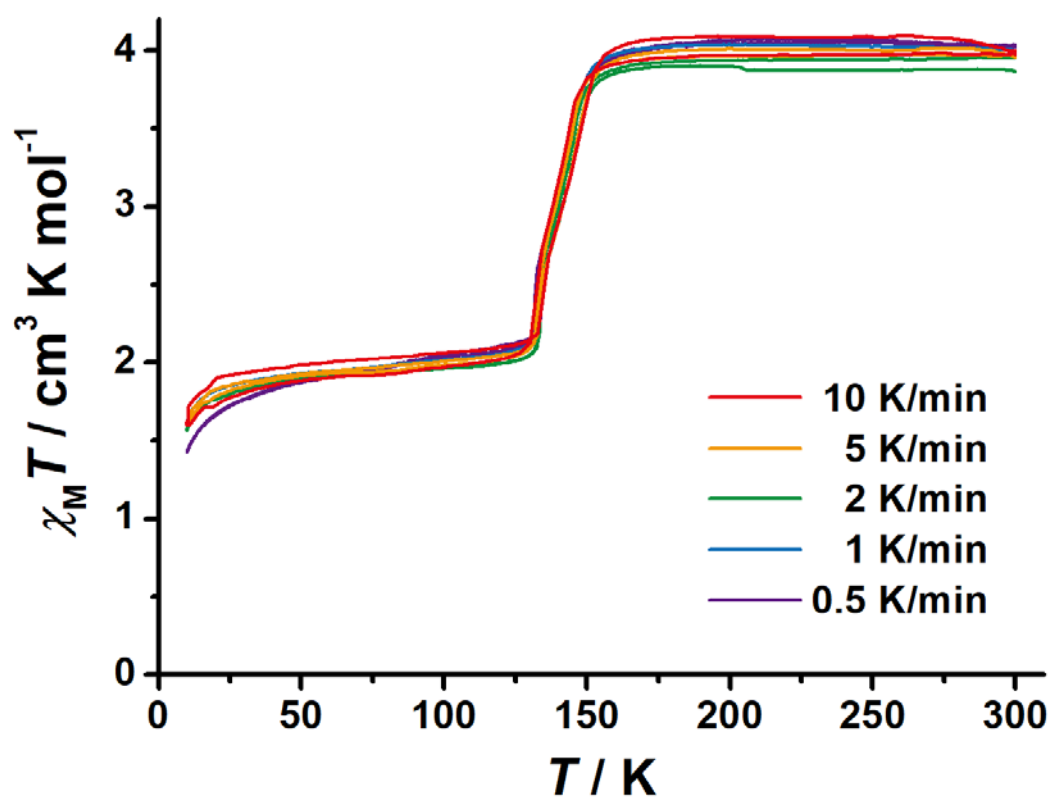

**Figure S1** Temperature dependence of the molar magnetic susceptibility  $\chi_M T$  products for **1** in different temperature sweeping rates.

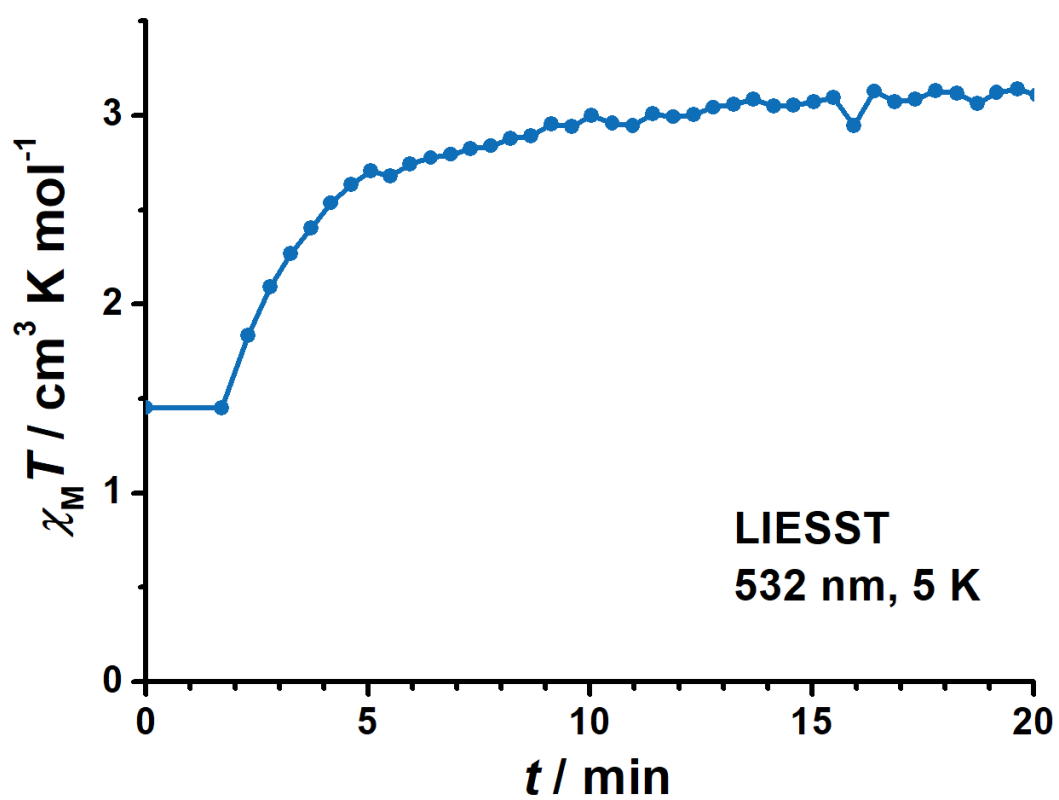

**Figure S2** Time dependence of the molar magnetic susceptibility  $\chi_M T$  products for **1** during LIESST (from MS to HS state) at 5 K. The laser was turned on immediately after  $t = 0$ .

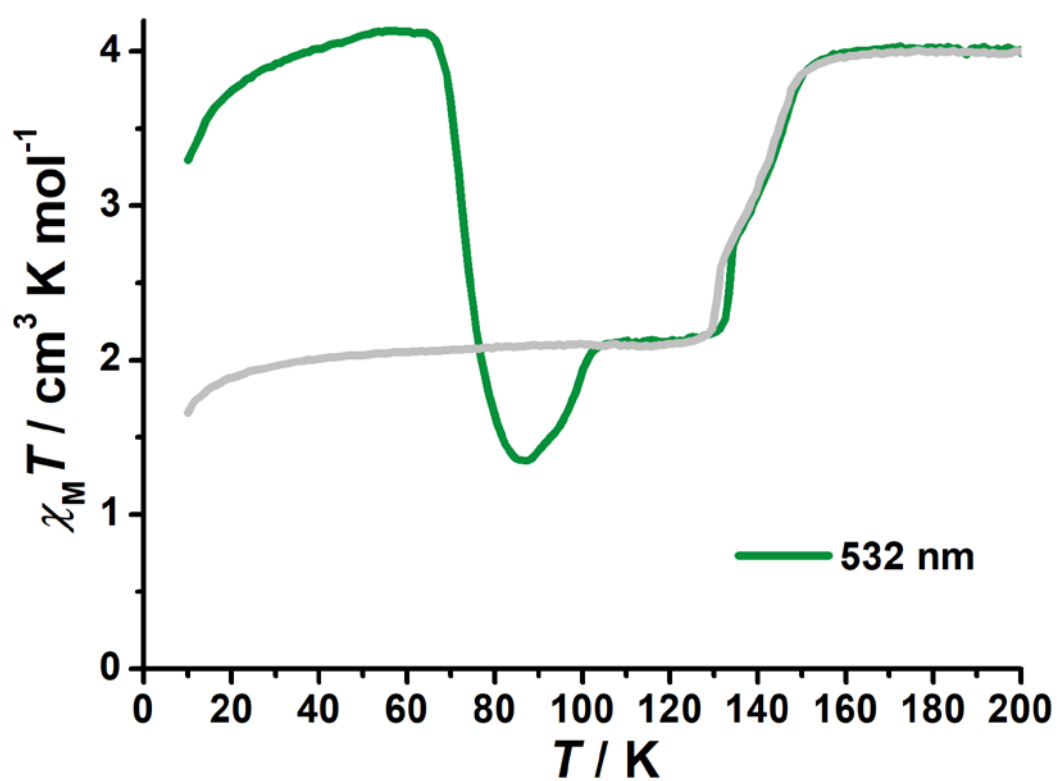

**Figure S3** Temperature dependence of  $\chi_M T$  for **1** in warming mode after LIESST at 5 K, without holding or annealing. The grey line represents the normal SCO in the cooling mode for reference. Temperature sweeping rate: 2 K/min.

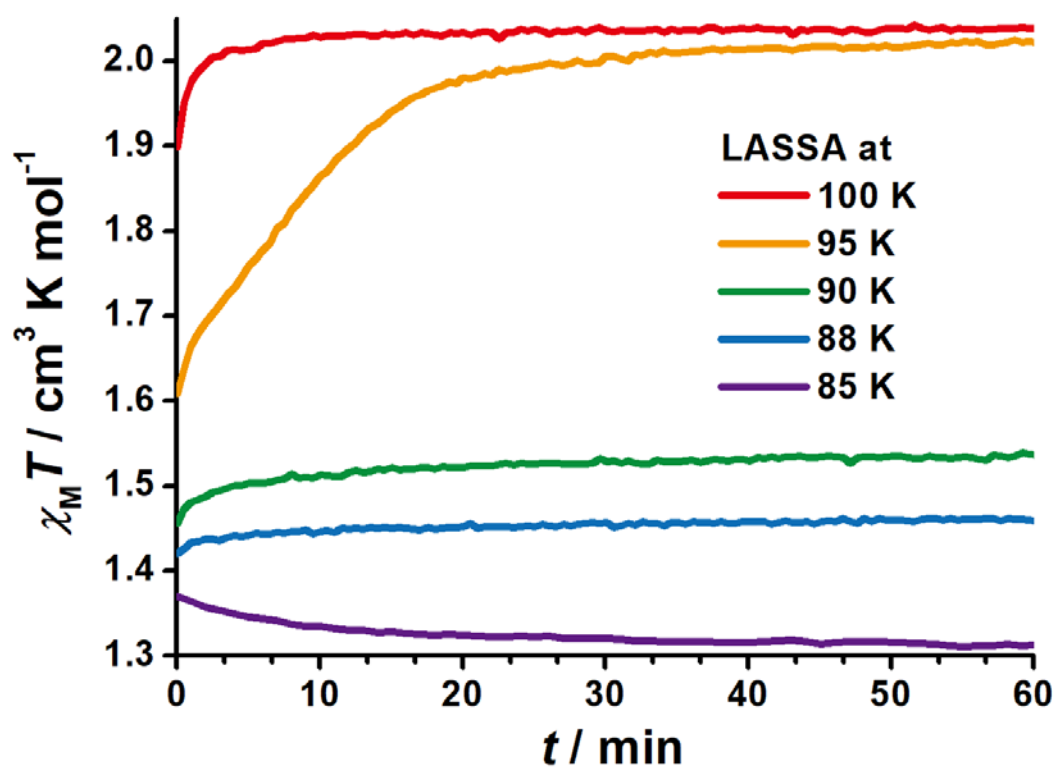

**Figure S4** Time dependence of the molar magnetic susceptibility  $\chi_M T$  products for **1** during high temperature LASSA: LIESST from MS to HS state at 5 K and then annealed at various temperatures.

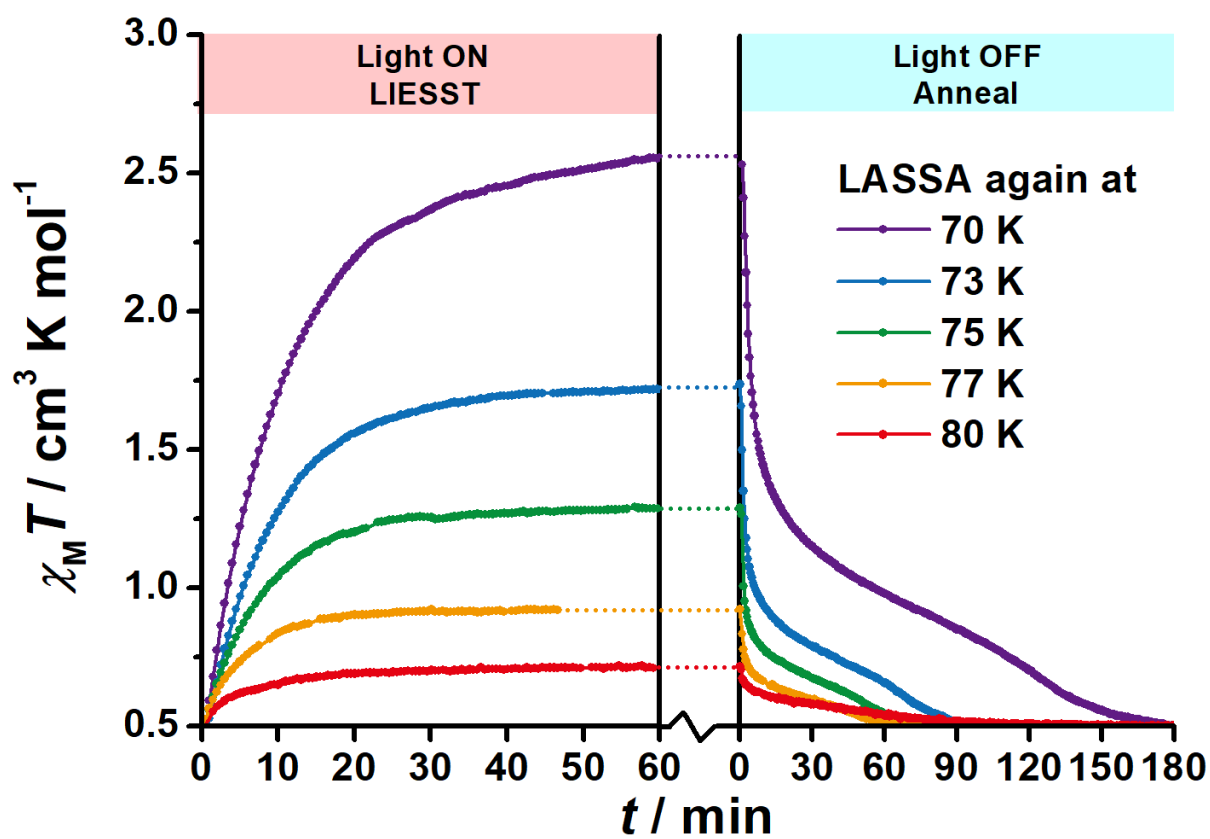

**Figure S5** Time dependence of the molar magnetic susceptibility  $\chi_M T$  products for **1** starting from the LASSA-LS state obtained at 75 K, and performing LASSA again at various temperatures with a 532 nm laser.

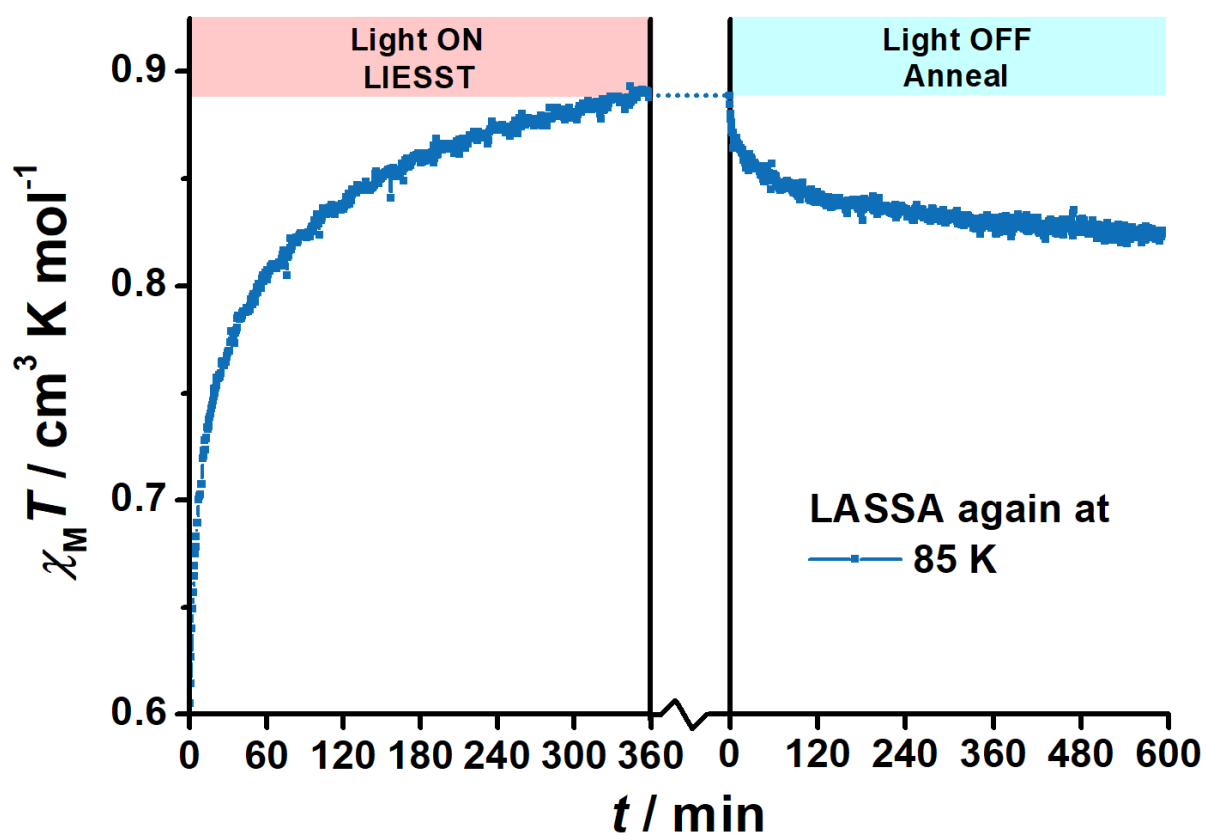

**Figure S6** Time dependence of the molar magnetic susceptibility  $\chi_M T$  products for **1** starting from the LASSA-LS state obtained at 75 K, and performing LASSA again at 85 K with a 532 nm laser. Note the largely different time scale with Figure S5.



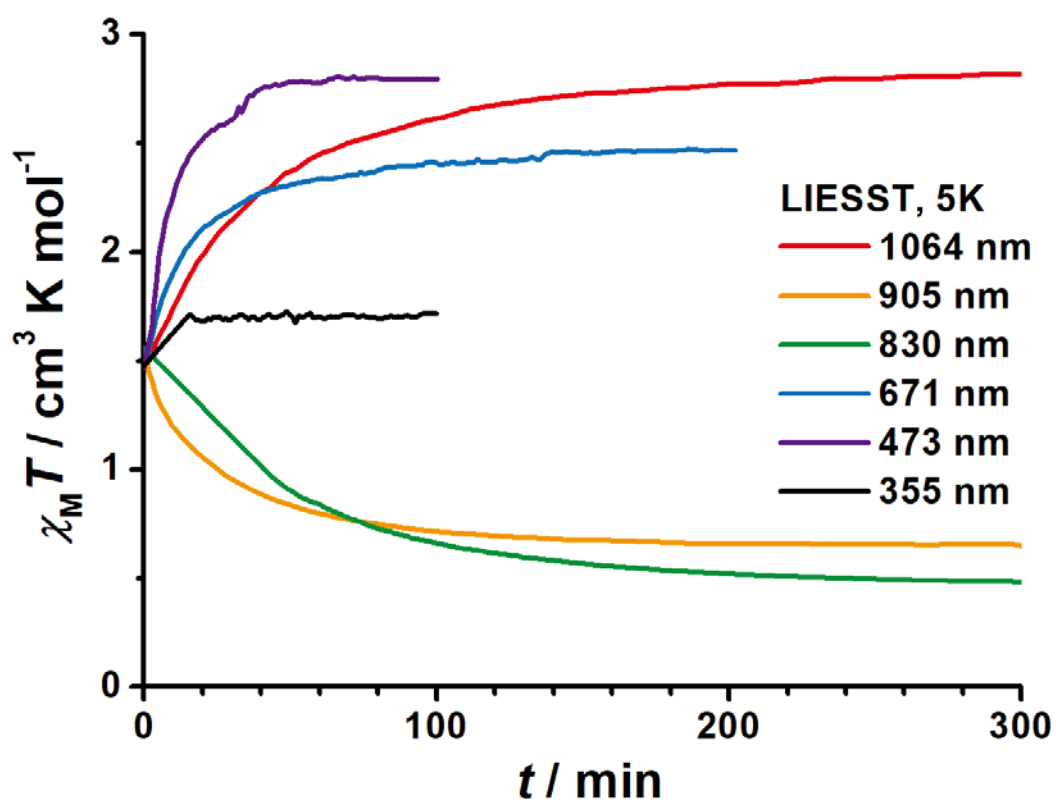

**Figure S7** Time dependence of the molar magnetic susceptibility  $\chi_M T$  products for **1** during LIESST (from MS state) at 5 K with various sources of laser until saturation. The laser was turned on immediately after  $t = 0$ .

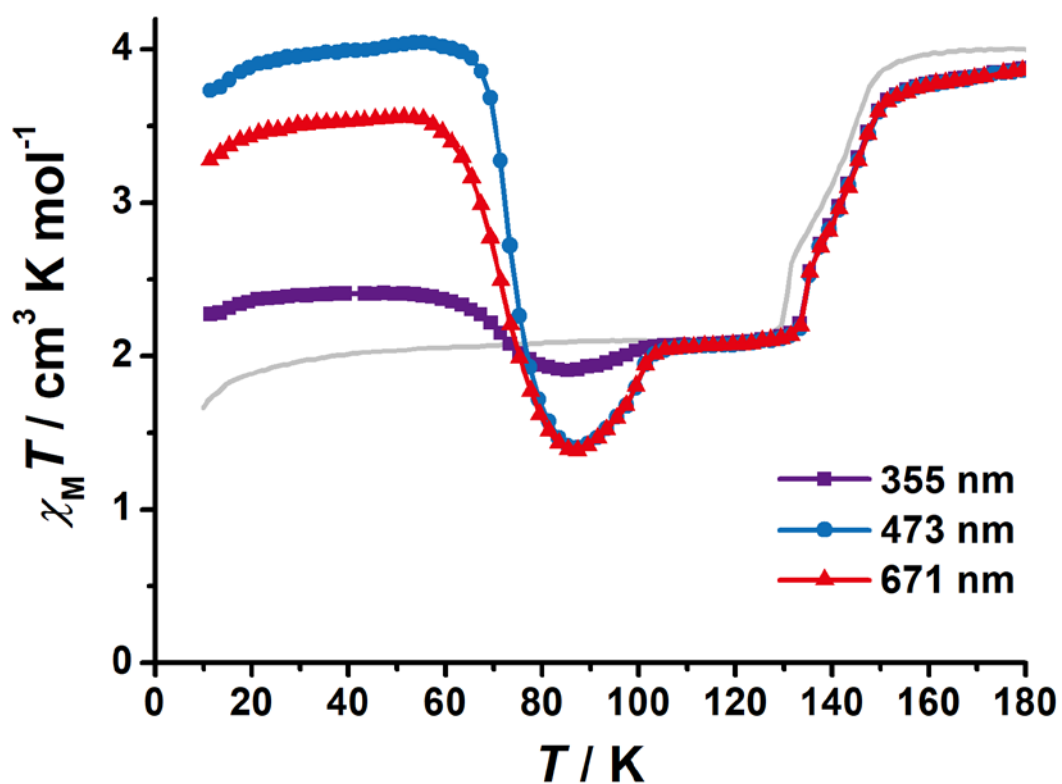

**Figure S8** Temperature dependence of the molar magnetic susceptibility  $\chi_M T$  products for **1** in warming mode after LIESST (from MS state at 5 K) with a 355 nm (purple), 473 nm (blue) and 671 nm (red) laser. The grey line represents the normal SCO in the cooling mode for reference. Temperature sweeping rate: 2 K/min.

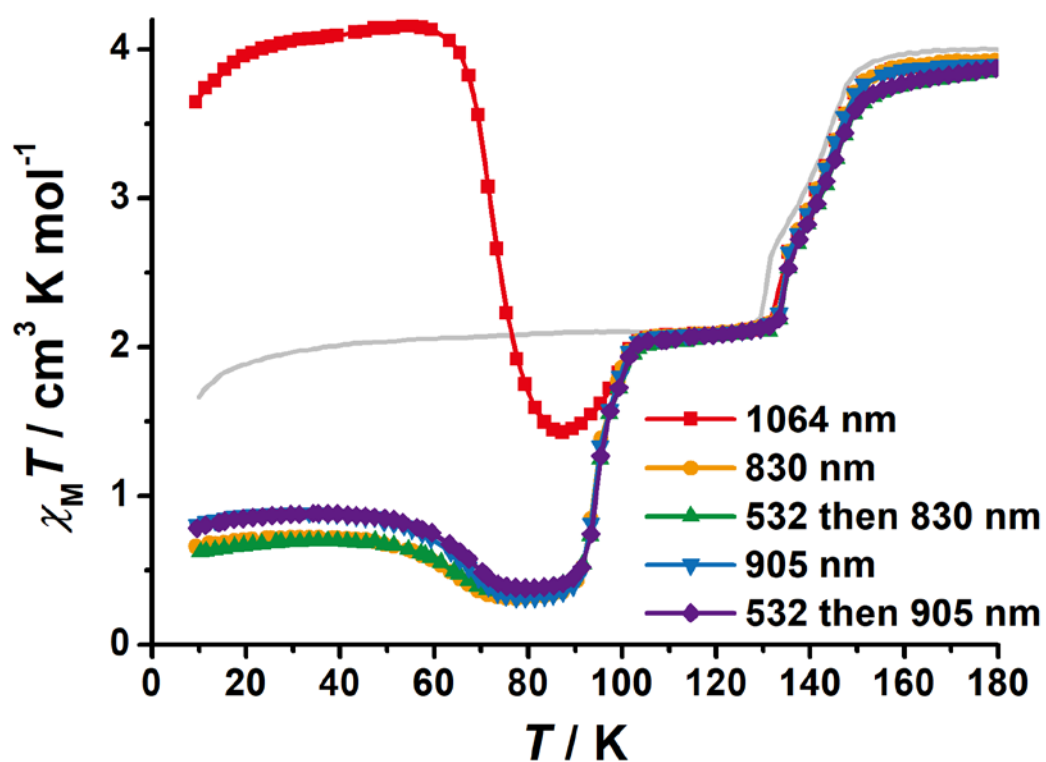

**Figure S9** Temperature dependence of the molar magnetic susceptibility  $\chi_M T$  products for **1** in warming mode after LIESST (from MS state at 5 K) with a infrared 1064 nm (red), 830 nm (orange) and 905 nm (blue) laser, and after bidirectional LIESST with firstly a 532 nm laser (which excites **1** from MS to HS state at 5 K) and secondly a 830 nm (green) or 905 nm laser (purple). The grey line represents the normal SCO in the cooling mode for reference. Temperature sweeping rate: 2 K/min.

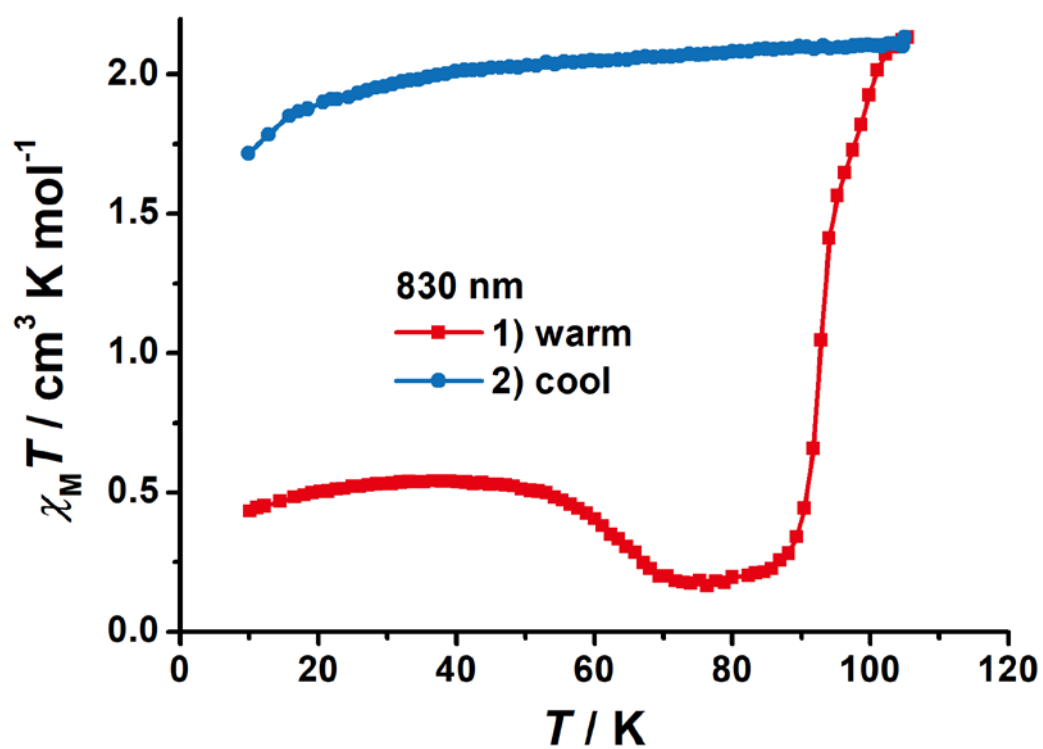

**Figure S10** Temperature dependence of the molar magnetic susceptibility  $\chi_M T$  products for **1** after the 830 nm reverse-LIESST (from MS state at 5 K) in warming mode to 105 K (red) and then in cooling (blue) mode. No hidden hysteresis is observed. Temperature sweeping rate: 2 K/min.

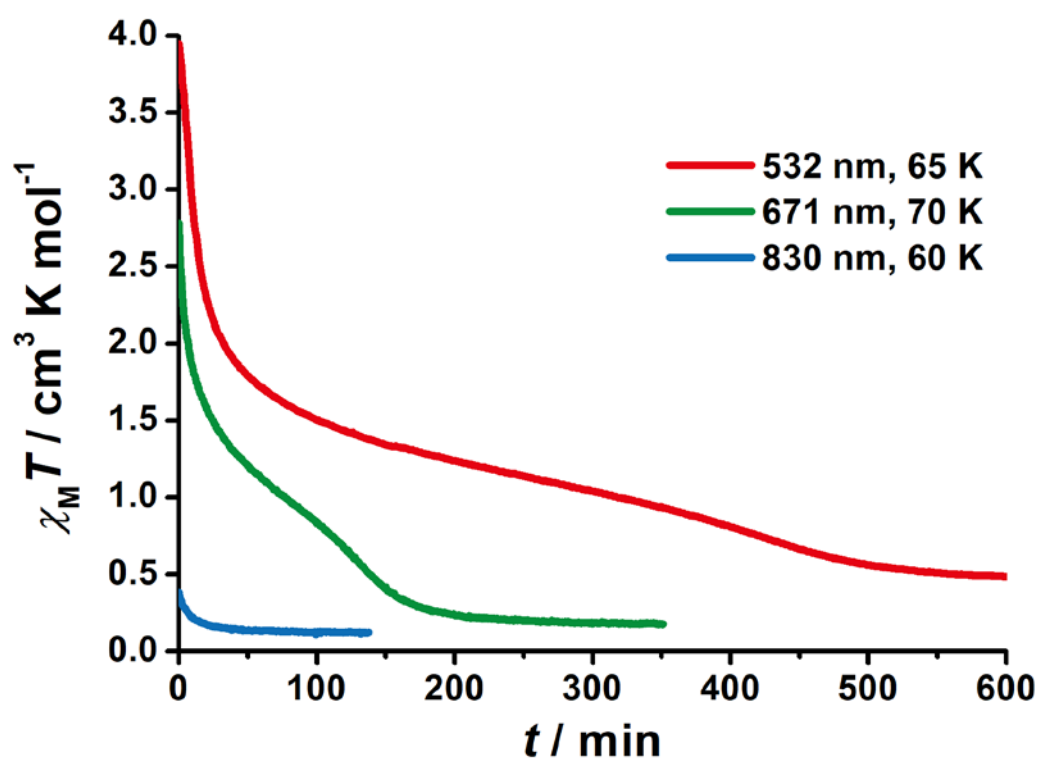

**Figure S11** Time dependence of the molar magnetic susceptibility  $\chi_M T$  products for **1** after LIESST with various lasers and then annealing at indicated temperatures.

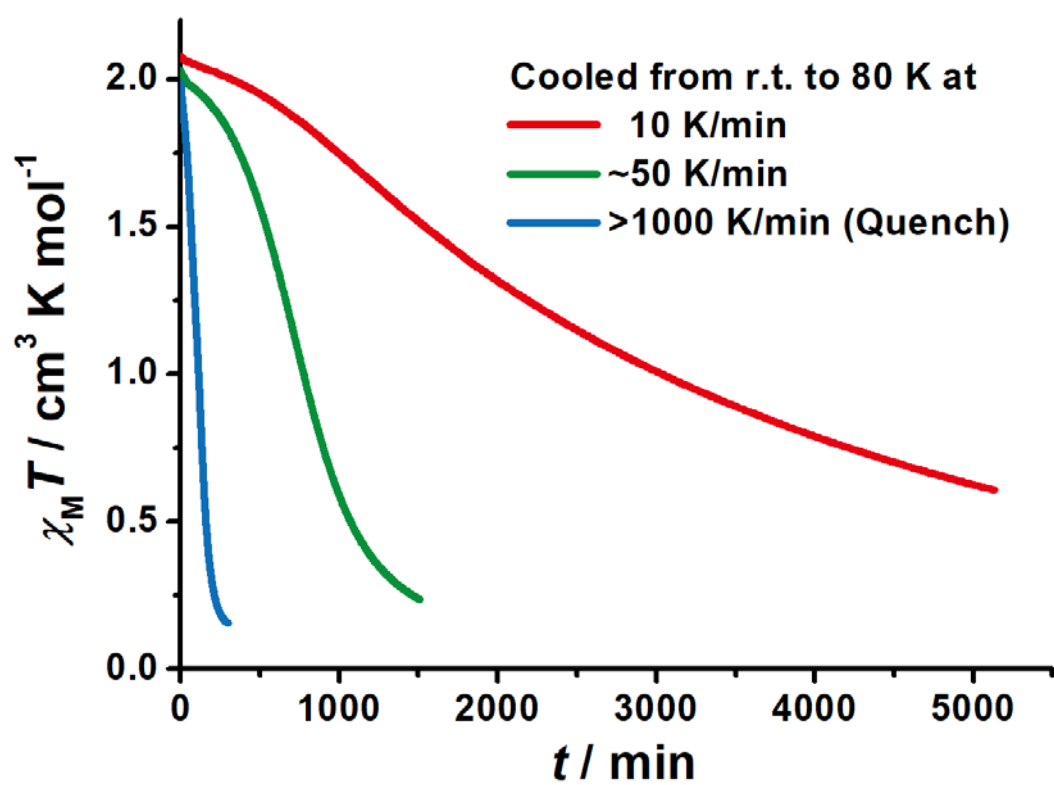

**Figure S12** Time dependence of the molar magnetic susceptibility  $\chi_M T$  products for **1** after cooling from room temperature to 80 K at various cooling rates.

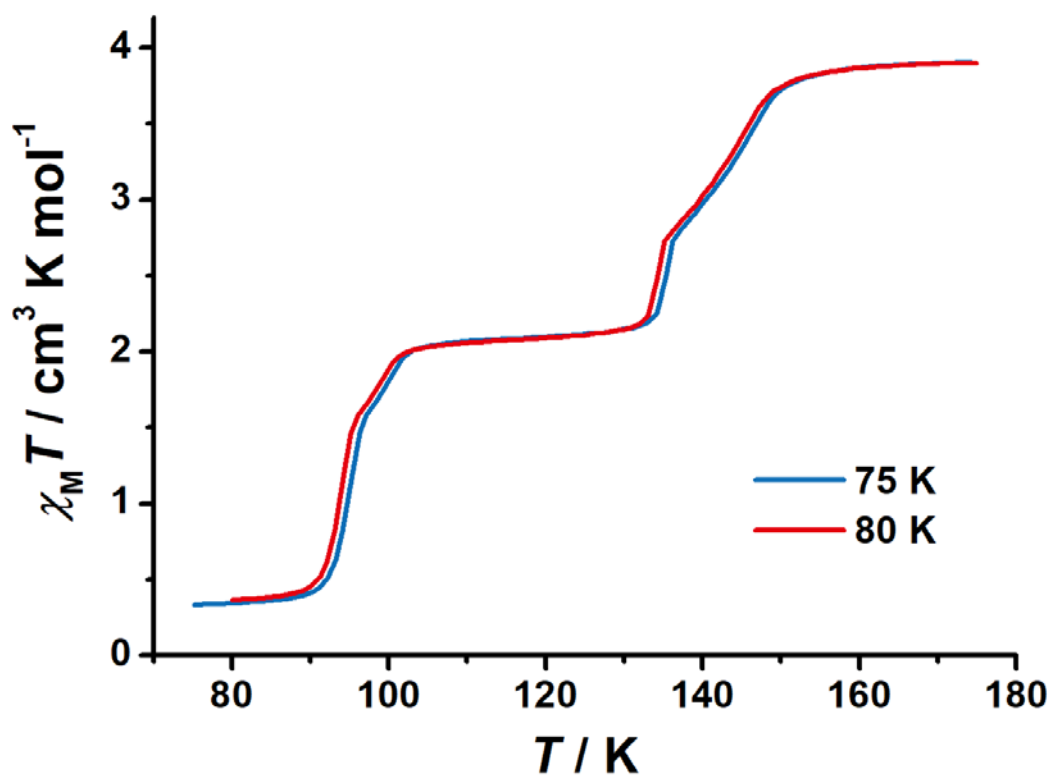

**Figure S13** Temperature dependence of the molar magnetic susceptibility  $\chi_M T$  products for **1** in warming mode starting from the TASSA-LS states obtained at 75 K (blue) and 80 K (red). Temperature sweeping rate: 2 K/min.

**Table S1.** Crystal Data and Structural Refinements for **1**.

| State                                          | 170HS                                                            | 80MS-Order  | 80MS-Disorder | 80LS        |
|------------------------------------------------|------------------------------------------------------------------|-------------|---------------|-------------|
| Chemical formula                               | C <sub>22</sub> H <sub>14</sub> Au <sub>2</sub> FeN <sub>6</sub> |             |               |             |
| Formula Mass                                   | 812.17                                                           |             |               |             |
| Radiation type                                 | MoK $\alpha$                                                     |             |               |             |
| No. of formula units per unit cell, Z          | 4                                                                |             |               |             |
| $F(000)$                                       | 1488                                                             |             |               |             |
| Temperature / K                                | 170(2)                                                           | 80(2)       | 80(2)         | 80(2)       |
| Crystal system                                 | Monoclinic                                                       | Triclinic   | Monoclinic    | Monoclinic  |
| Space group                                    | $P2_1/c$                                                         | $P\bar{1}$  | $P2_1/c$      | $P2_1/c$    |
| $a / \text{\AA}$                               | 10.8116(5)                                                       | 10.7701(10) | 10.7397(12)   | 10.7739(5)  |
| $b / \text{\AA}$                               | 14.4381(6)                                                       | 14.1621(12) | 14.1109(14)   | 13.9861(6)  |
| $c / \text{\AA}$                               | 14.9803(7)                                                       | 14.7425(13) | 14.6790(16)   | 14.5762(7)  |
| $\alpha / ^\circ$                              | 90                                                               | 90.082(3)   | 90            | 90          |
| $\beta / ^\circ$                               | 96.596(2)                                                        | 96.077(3)   | 95.980(3)     | 95.770(2)   |
| $\gamma / ^\circ$                              | 90                                                               | 90.471(3)   | 90            | 90          |
| Unit cell volume / $\text{\AA}^3$              | 2322.93(18)                                                      | 2235.9(3)   | 2212.5(4)     | 2185.28(17) |
| Absorption coefficient, $\mu / \text{mm}^{-1}$ | 13.237                                                           | 13.752      | 13.898        | 14.070      |
| No. of reflections measured                    | 74552                                                            | 62051       | 14510         | 66879       |
| No. of independent reflections                 | 4815                                                             | 7641        | 4432          | 4532        |
| $R_{\text{int}}$                               | 0.0383                                                           | 0.0452      | 0.0887        | 0.0462      |
| $R_1^a (I > 2\sigma(I))$                       | 0.0301                                                           | 0.0909      | 0.0676        | 0.0391      |
| $wR_2^b$ (all data)                            | 0.0745                                                           | 0.2285      | 0.1487        | 0.0865      |
| Goodness of fit on $F^2$                       | 1.077                                                            | 1.349       | 1.107         | 1.162       |

$$^a R_1 = \frac{\sum ||F_o| - |F_c||}{\sum |F_o|}$$

$$^b wR_2 = [\frac{\sum w(F_o^2 - F_c^2)^2}{\sum w(F_o^2)^2}]^{1/2}.$$



**Table S2.** Selected bond lengths (Å) and bond angles (°), sorted in ascending order, for **1**.

|        | 170HS     | 80MS-Order |          | 80MS-Disorder | 80LS     |
|--------|-----------|------------|----------|---------------|----------|
|        |           | Fe1        | Fe2      |               |          |
| Fe-N   | 2.145(5)  | 2.07(2)    | 1.97(2)  | 2.015(16)     | 1.974(8) |
|        | 2.159(5)  | 2.10(2)    | 1.97(3)  | 2.028(17)     | 1.976(9) |
|        | 2.165(5)  | 2.11(2)    | 1.97(3)  | 2.039(17)     | 1.981(8) |
|        | 2.168(5)  | 2.13(3)    | 2.00(2)  | 2.044(17)     | 1.985(9) |
|        | 2.198(6)  | 2.15(3)    | 2.05(2)  | 2.072(13)     | 2.041(8) |
|        | 2.200(5)  | 2.16(2)    | 2.05(2)  | 2.080(16)     | 2.044(9) |
| N-Fe-N | 88.20(19) | 87.4(9)    | 88.4(9)  | 88.2(6)       | 88.1(3)  |
|        | 88.21(19) | 88.4(9)    | 88.6(10) | 88.7(6)       | 88.6(3)  |
|        | 88.9(2)   | 88.4(9)    | 88.8(10) | 88.8(6)       | 88.7(3)  |
|        | 89.1(2)   | 88.5(9)    | 89.2(10) | 89.3(6)       | 89.6(3)  |
|        | 89.4(2)   | 89.5(9)    | 89.3(9)  | 89.4(6)       | 89.6(3)  |
|        | 89.6(2)   | 89.5(9)    | 89.6(10) | 89.7(6)       | 89.8(3)  |
|        | 90.2(2)   | 90.6(10)   | 89.7(9)  | 89.7(6)       | 90.1(3)  |
|        | 90.3(2)   | 90.7(9)    | 90.1(10) | 89.7(6)       | 90.3(3)  |
|        | 90.7(2)   | 90.7(9)    | 91.1(10) | 90.6(6)       | 90.5(3)  |
|        | 90.7(2)   | 91.2(9)    | 91.5(10) | 91.1(6)       | 91.2(3)  |
|        | 92.0(2)   | 91.4(10)   | 91.5(10) | 92.1(6)       | 91.5(3)  |
|        | 92.6(2)   | 93.6(9)    | 92.3(10) | 92.6(6)       | 92.0(3)  |

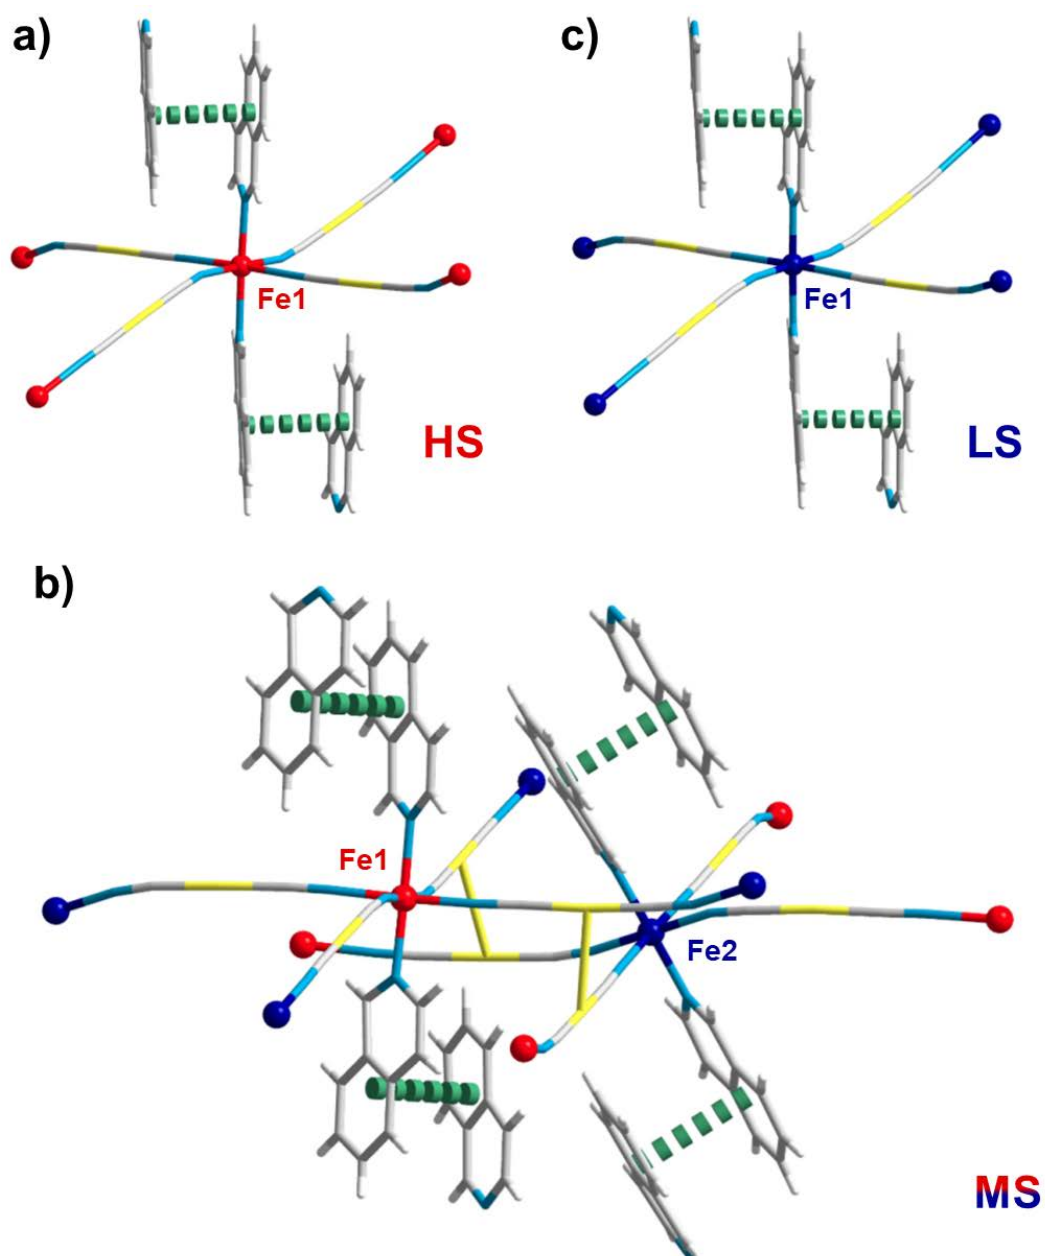

**Figure S14.** Crystal structure for **1** in the HS state at 170 K (a); in the ordered MS state at 80 K (b, by slow cooling); and in the LS state at 80 K (c, by rapid quench and annealed), showing the coordination environment of Fe, the spin state of the neighboring Fe (by color), and the interlayer offset  $\pi$ - $\pi$  stacking (green dash lines). Color codes: Fe(HS), red; Fe(LS), blue; Au, yellow; N, cyan; C, gray.

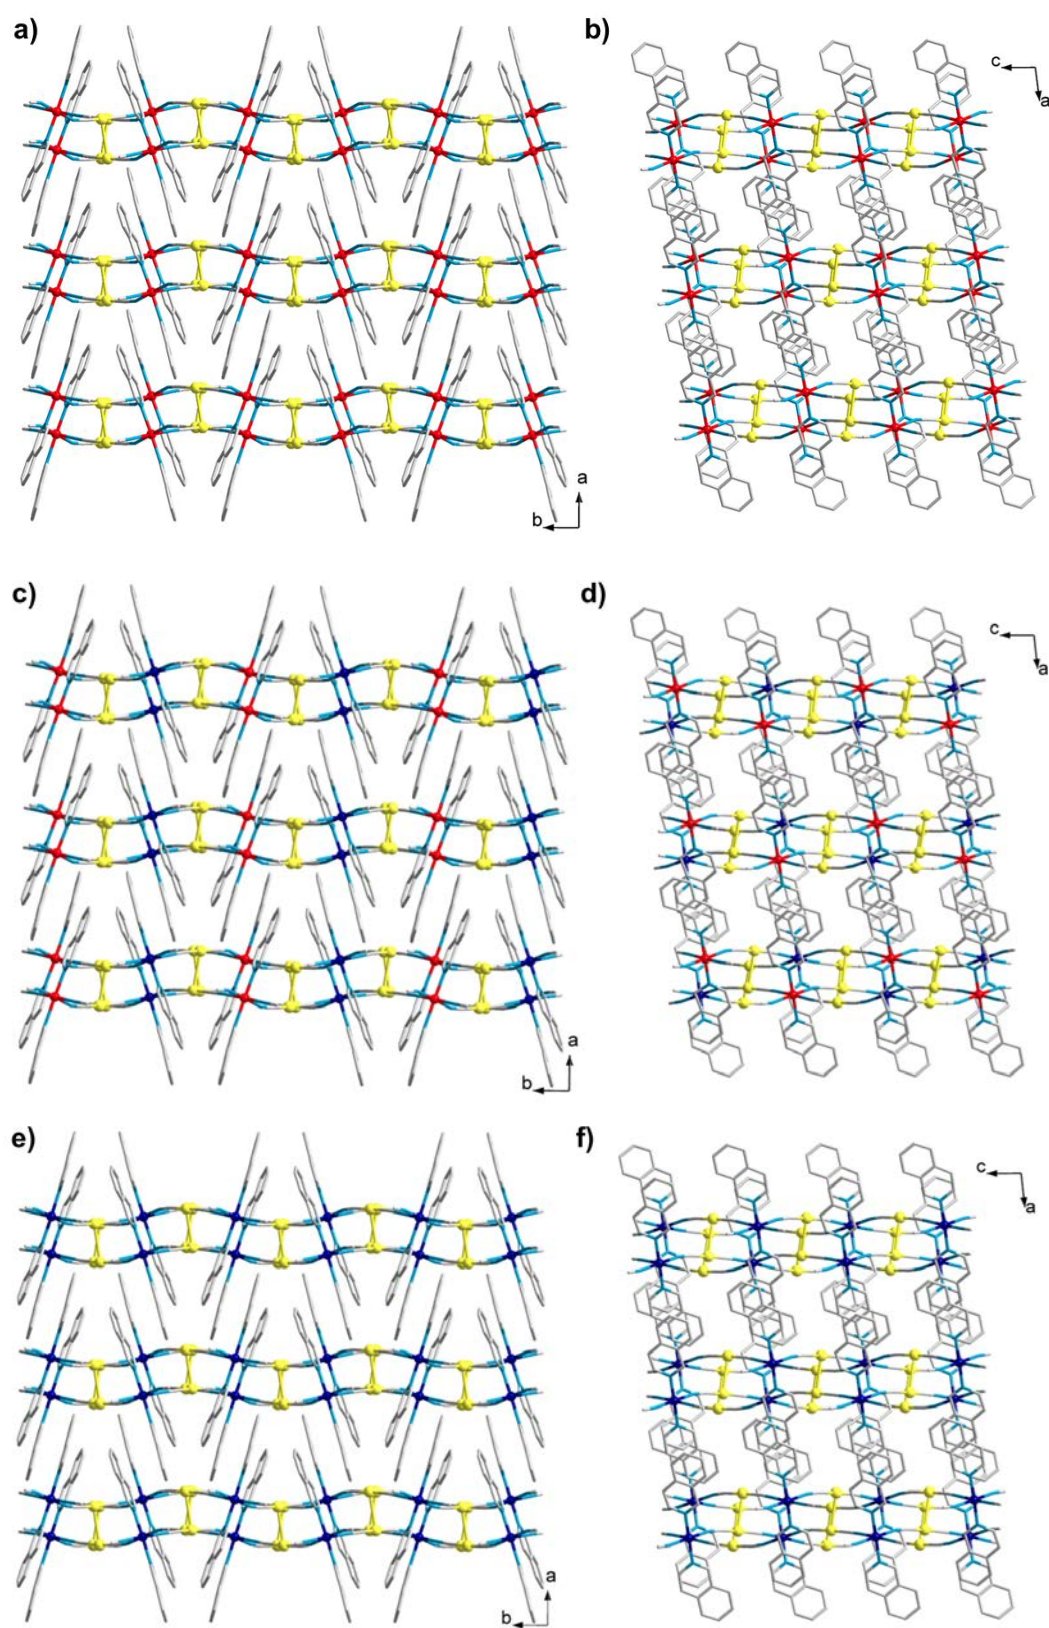

**Figure S15.** Crystal structure for **1** in the HS state at 170 K (a-b); in the ordered MS state at 80 K (c-d, by slow cooling); and in the LS state at 80 K (e-f, by rapid quench and annealed), showing the packing diagram along the *c* axis (a, c, e) and the *b* axis (b,d,f). Color codes: Fe(HS), red; Fe(LS), blue; Au, yellow; N, cyan; C, gray.



**Table S3.** Selected structural parameters in different states for **1**.

|                                    | <b>170HS</b> | <b>80MS-Order</b> | <b>80MS-Disorder</b> | <b>80LS</b> |
|------------------------------------|--------------|-------------------|----------------------|-------------|
| Fe...(NCAuCN)...Fe <sup>a</sup> /Å |              | 10.202(6)         |                      |             |
|                                    | 10.3975(11)  | 10.225(6)         | 10.174(4)            | 10.0914(19) |
|                                    | 10.4080(11)  | 10.226(6)         | 10.188(4)            | 10.1096(19) |
|                                    |              | 10.232(6)         |                      |             |
| Fe...Fe <sup>b</sup> /Å            | 7.6570(12)   | 7.5329(45)        | 7.503(4)             | 7.4549(19)  |
| Au...Au <sup>c</sup> /Å            | 3.0490(3)    | 3.0182(15)        | 3.0037(9)            | 2.9985(5)   |
|                                    |              | 3.0187(15)        |                      |             |
| $\pi$ ... $\pi$ <sup>d</sup> /Å    | 3.5309(1)    | 3.4833(3)         | 3.4698(3)            | 3.4409(1)   |
|                                    |              | 3.4871(3)         |                      |             |

<sup>a</sup>The Fe...Fe distance linked by [Au(CN)<sub>2</sub>]

<sup>b</sup>The nearest Fe...Fe distance.

<sup>c</sup>The aurophilic interactions.

<sup>d</sup>The interlayer offset  $\pi$ - $\pi$  stacking between isoq ligands (as depicted in Figure S14).



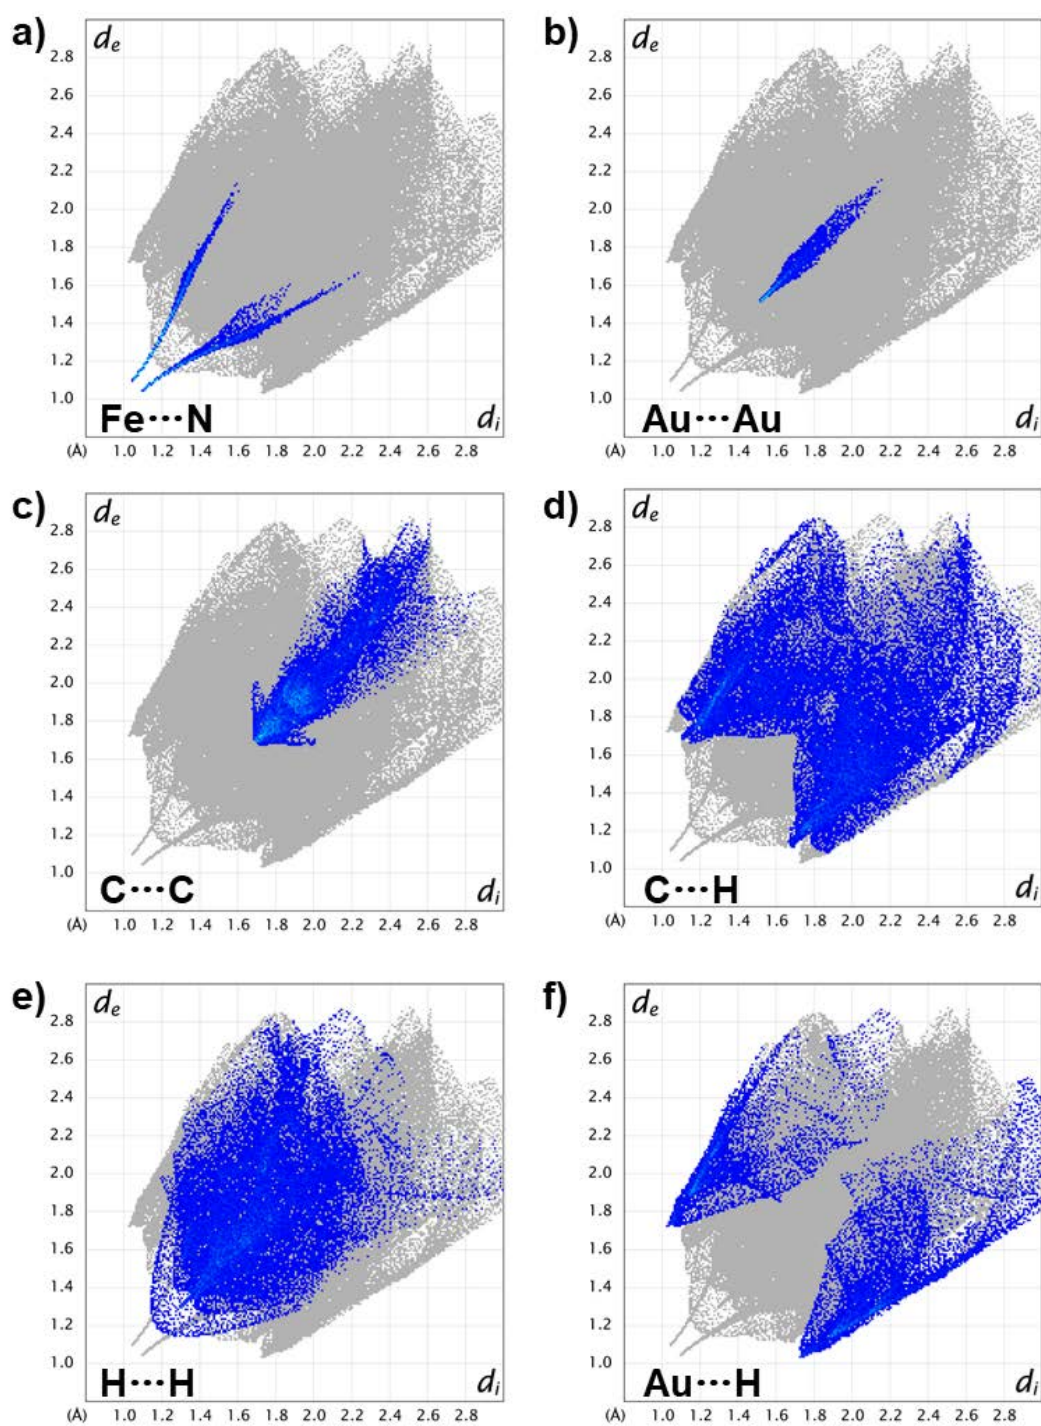

## HS

**Figure S17.** Fingerprint plot of **1** in the HS state at 170 K resolved into Fe...N (a), Au...Au (b), C...C (c), C...H (d) H...H (e) and Au...H (f) contacts. The full fingerprint is plotted beneath (grey).

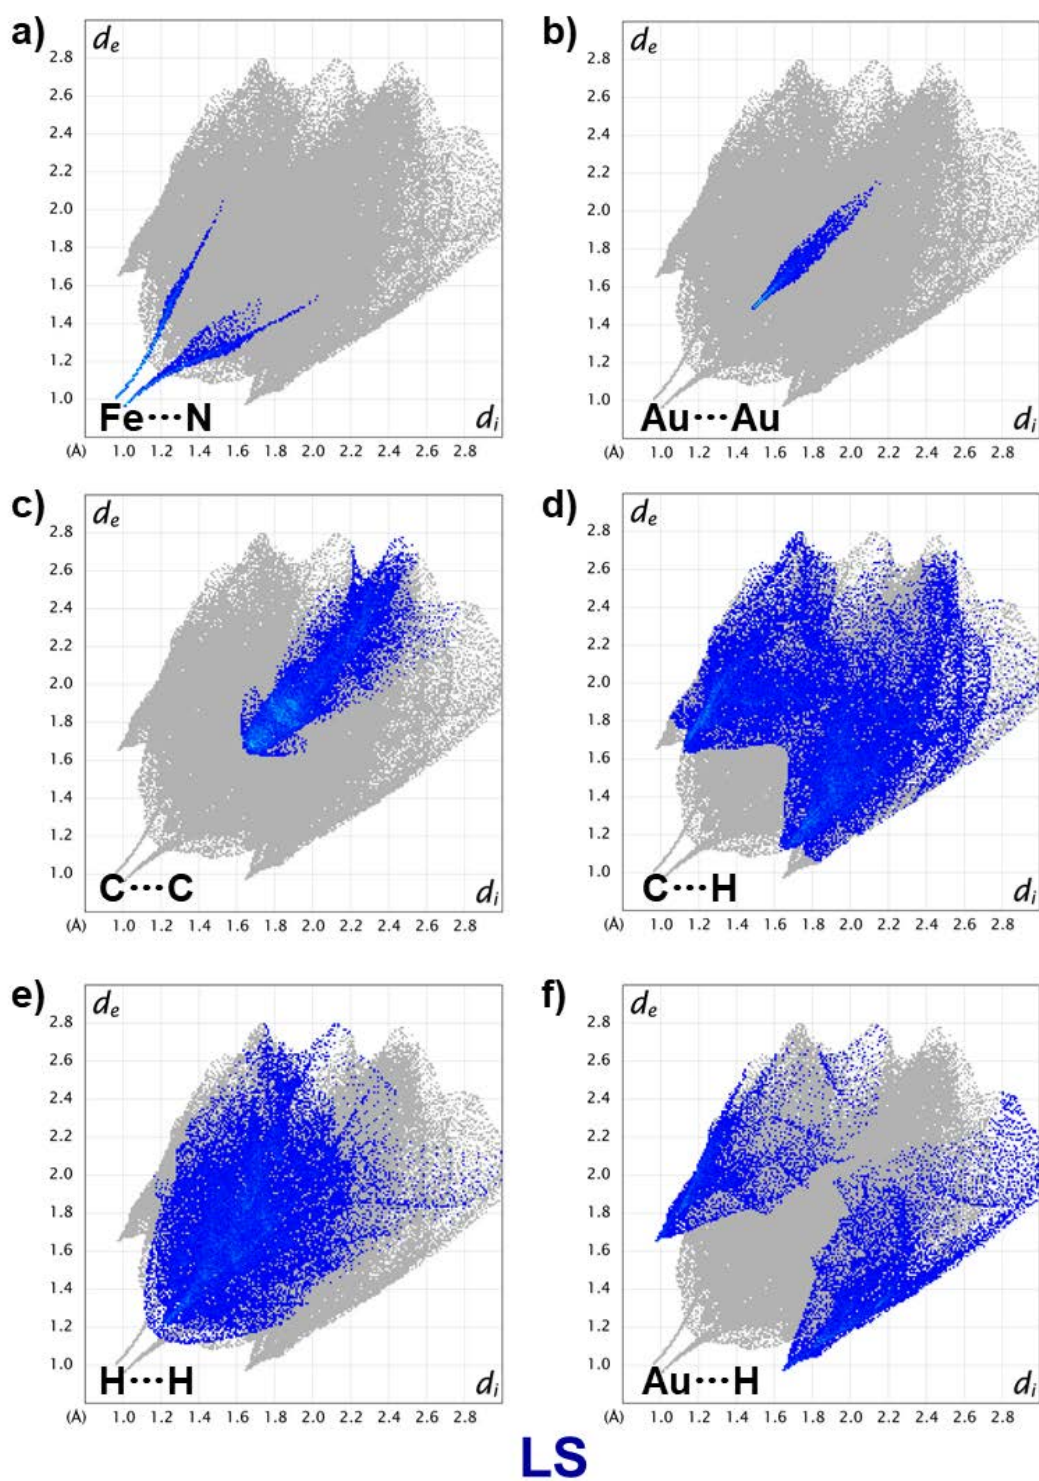

**Figure S18.** Fingerprint plot of **1** in the LS state at 80 K resolved into Fe...N (a), Au...Au (b), C...C (c), C...H (d) H...H (e) and Au...H (f) contacts. The full fingerprint is plotted beneath (grey).

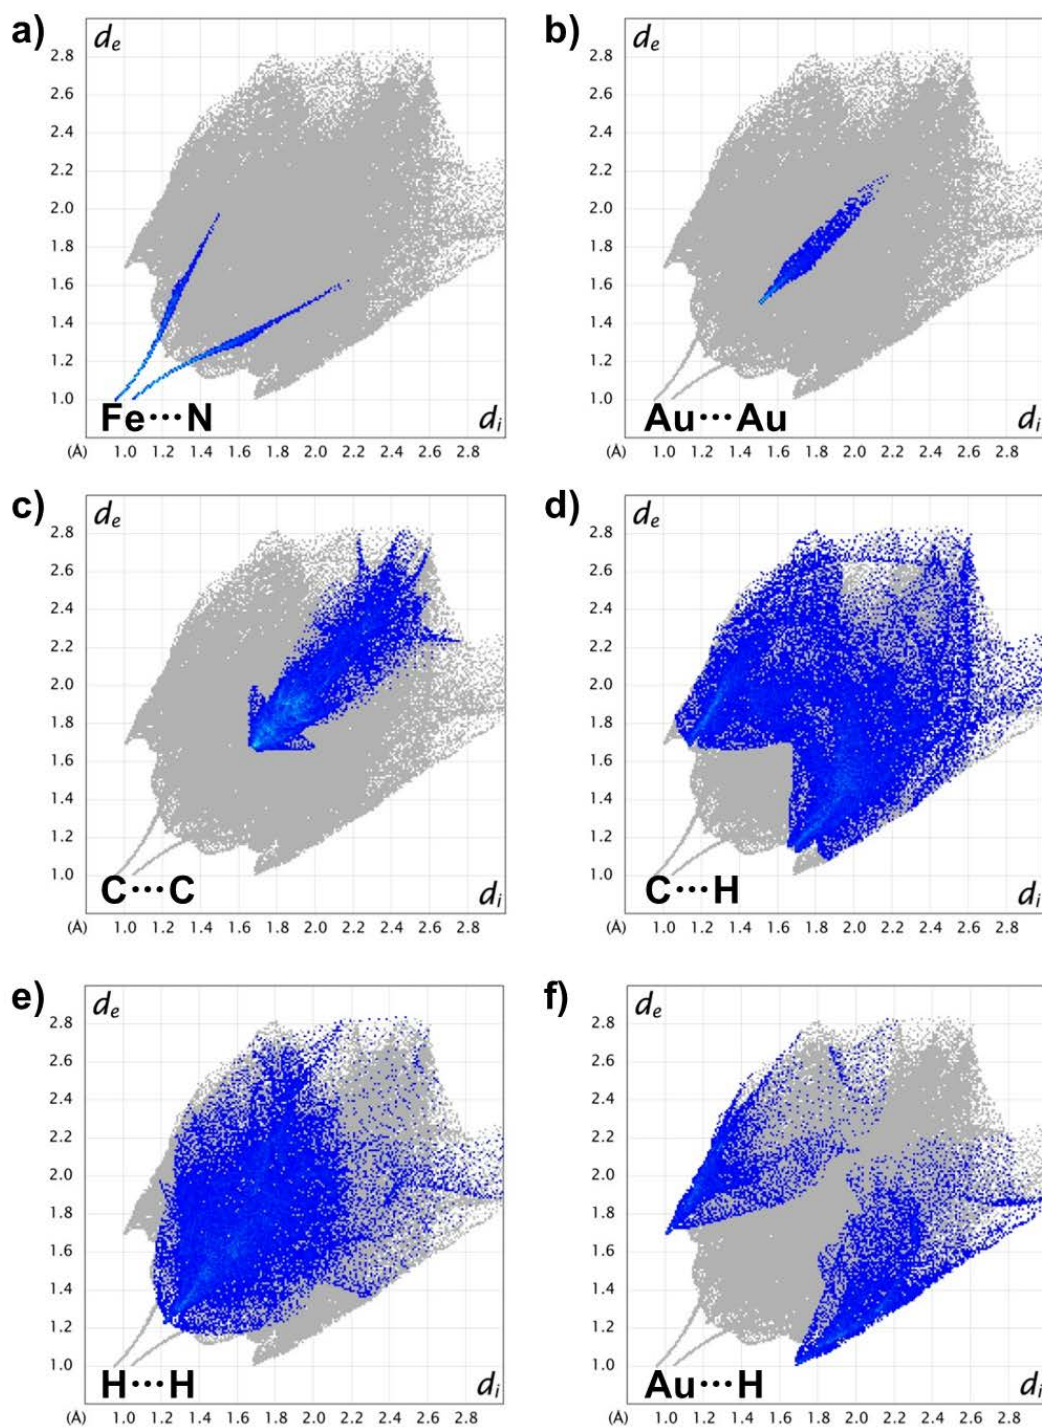

## HS(Fe1) in MS

**Figure S19.** Fingerprint plot of the high spin Fe1 in **1** in the ordered MS state at 80 K resolved into Fe...N (a), Au...Au (b), C...C (c), C...H (d) H...H (e) and Au...H (f) contacts. The full fingerprint is plotted beneath (grey).



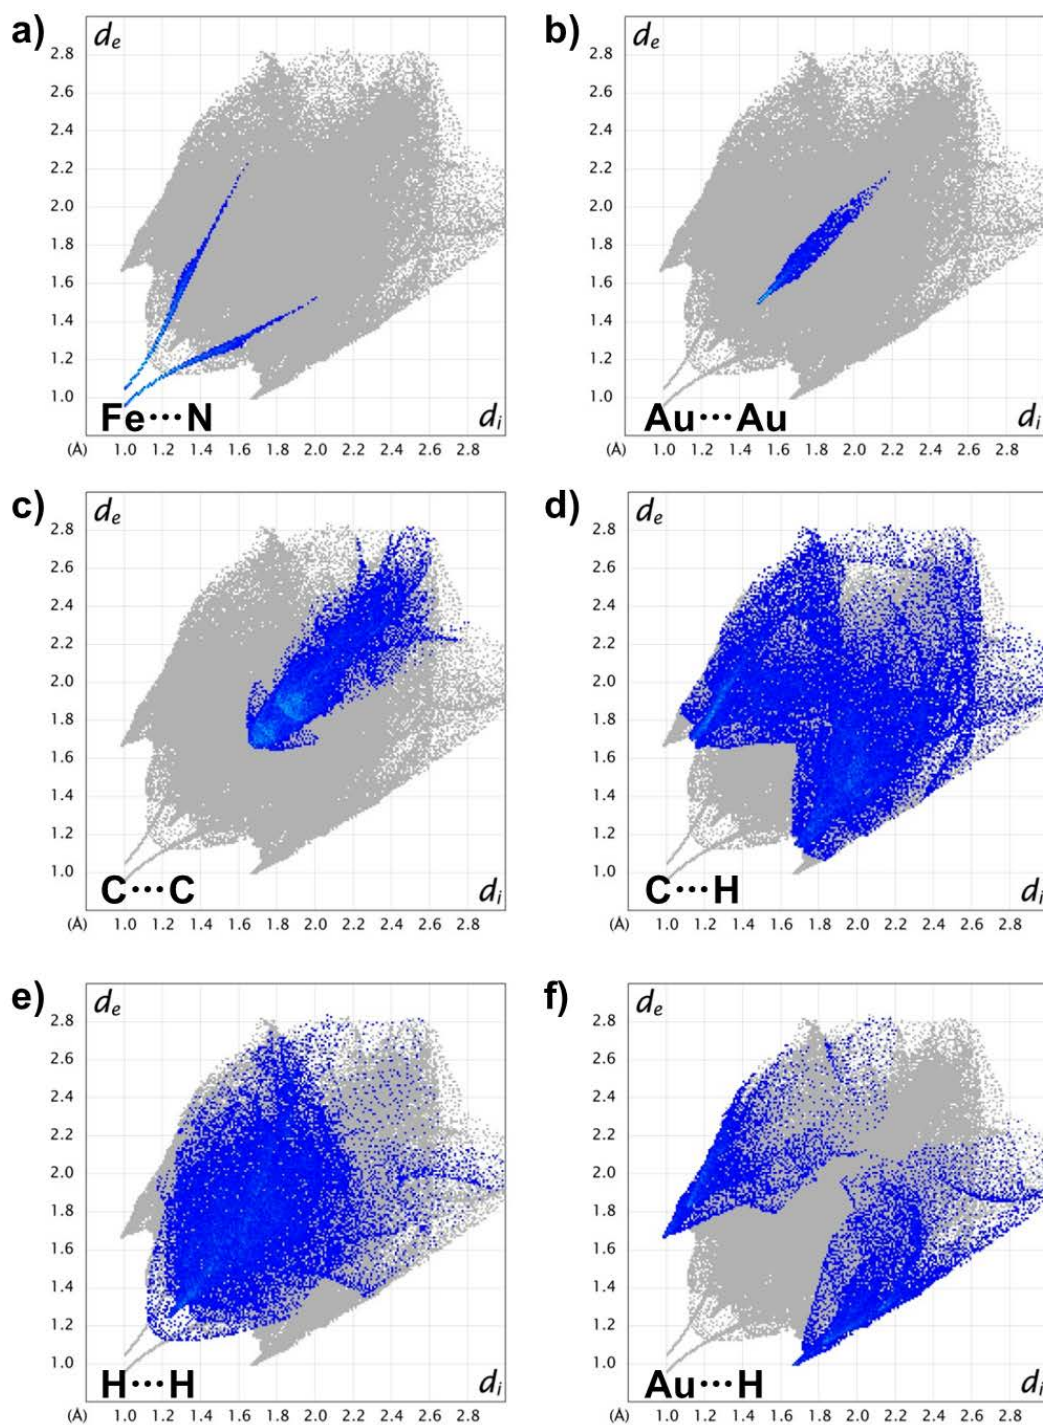

## LS(Fe<sup>2+</sup>) in MS

**Figure S20.** Fingerprint plot of the low spin Fe<sup>2+</sup> in **1** in the ordered MS state at 80 K resolved into Fe...N (a), Au...Au (b), C...C (c), C...H (d) H...H (e) and Au...H (f) contacts. The full fingerprint is plotted beneath (grey).

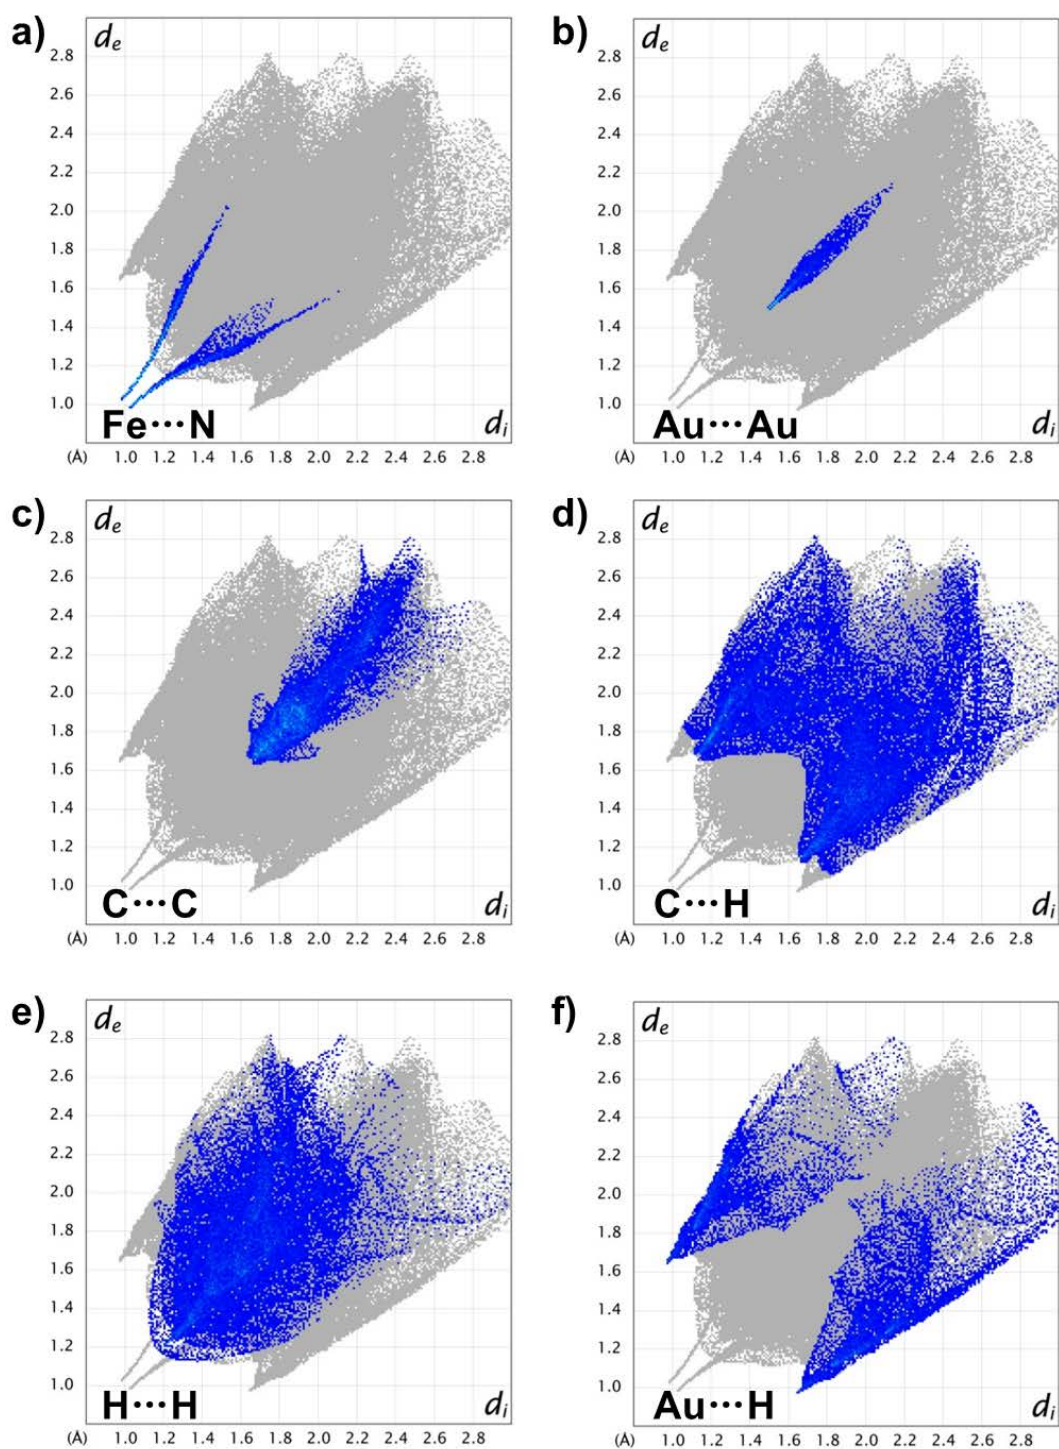

## Disordered $MS^*$

**Figure S21.** Fingerprint plot of **1** in the disordered  $MS^*$  state at 80 K resolved into Fe...N (a), Au...Au (b), C...C (c), C...H (d) H...H (e) and Au...H (f) contacts. The full fingerprint is plotted beneath (grey).

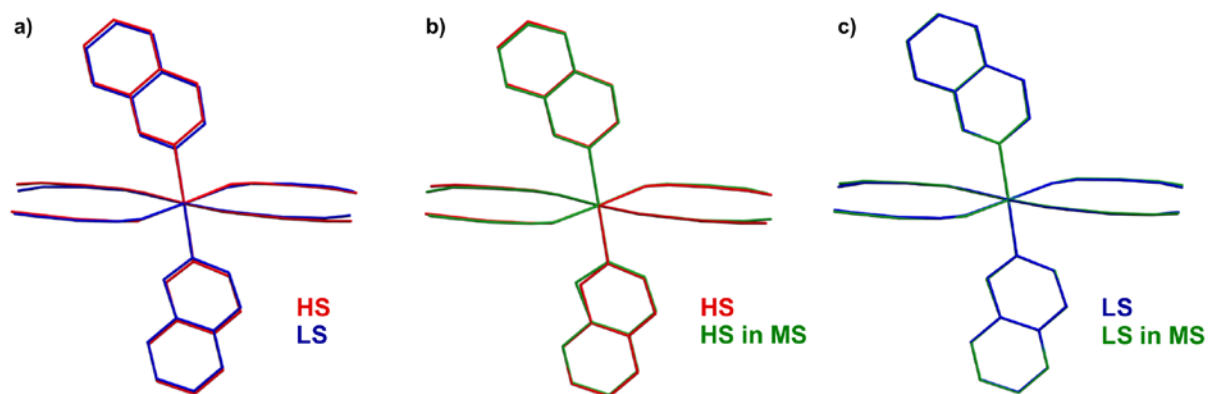

**Figure S22** Overlapped crystal structure for **1** in the HS state at 170 K (red); in the ordered MS state at 80 K (green); and in the LS state at 80 K (blue).
